# Supplementary material
Source: PubMed Central journal article supplement (PMC6166872)
Supplement: NIHMS1503764-supplement-2.pdf [file NIHMS1503764-supplement-2.pdf]

**Supplementary Table S1. Infants with extreme hyperbilirubinemia who met AAP criteria for exchange transfusion but did not receive the treatment**

| SN | Study ID | Sex | Age on admission (days) | Weight on admission (kg) | Max TSB (mg/dL) | AAP Risk Zone | Delivered in a hospital | Clinical risk factors | PCV (%) | BIND-M score | Reasons why exchange transfusion was not done                           |
|----|----------|-----|-------------------------|--------------------------|-----------------|---------------|-------------------------|-----------------------|---------|--------------|-------------------------------------------------------------------------|
| 1  | B254     | M   | 7                       | 3.10                     | 40.1            | Medium        | Yes                     | None                  | 37.0    | 8            | No umbilical stump, cannulation not attempted                           |
| 2  | B121     | F   | 5                       | 1.70                     | 39.3            | Medium        | Yes                     | None                  | 22.0    | 1            | Unable to cannulate                                                     |
| 3  | B124     | M   | 6                       | 2.40                     | 39.2            | Medium        | No                      | G6PD                  | 40.0    | 9            | No umbilical stump, cannulation not attempted                           |
| 4  | B189     | M   | 4                       | 3.75                     | 38.8            | Medium        | Yes                     | ABO                   | 30.0    | 4            | Unable to cannulate                                                     |
| 5  | B582     | F   | 7                       | 3.00                     | 36.4            | Medium        | Yes                     | G6PD                  | 41.0    | 7            | No umbilical stump, cannulation not attempted                           |
| 6  | B94      | M   | 4                       | 3.25                     | 35.4            | Medium        | Yes                     | Sepsis                | 35.0    | 8            | ET refused on religious grounds (Jehovah Witness)                       |
| 7  | B494     | M   | 6                       | 2.50                     | 34.1            | Medium        | Yes                     | G6PD                  | NA      | 9            | No umbilical stump, cannulation not attempted, Baby died before ET      |
| 8  | B203     | M   | 3                       | 2.75                     | 33.0            | Medium        | No                      | G6PD                  | 36.0    | 9            | Sepsis, Baby died before ET                                             |
| 9  | B68      | M   | 9                       | 2.10                     | 31.4            | Medium        | Yes                     | None                  | 22.0    | 9            | No umbilical stump, cannulation not attempted                           |
| 10 | B447     | M   | 5                       | 2.10                     | 30.8            | High          | Yes                     | G6PD                  | 33.0    | 6            | Failed umbilical cannulation                                            |
| 11 | B90      | M   | 5                       | 2.40                     | 30.2            | High          | No                      | Sepsis, G6PD          | 44.0    | 11           | Intensive PT reduced TSB while awaiting ET                              |
| 12 | B180     | M   | 4                       | 3.00                     | 28.6            | Medium        | No                      | ABO                   | 41.0    | 7            | Missing record                                                          |
| 13 | B383     | M   | 6                       | 3.25                     | 28.5            | Medium        | Yes                     | Sepsis                | 23.0    | 1            | No fresh whole blood due to industrial strike, blood transfusion given. |
| 14 | B612     | F   | 9                       | 3.00                     | 28.2            | Medium        | Yes                     | G6PD                  | 29.0    | 0            | No umbilical stump, cannulation not attempted, blood transfusion given. |
| 15 | B92      | M   | 5                       | 1.80                     | 26.6            | Medium        | No                      | None                  | 42.0    | 0            | No umbilical stump, cannulation not attempted                           |
| 16 | B56      | M   | 4                       | 1.80                     | 26.3            | Medium        | Yes                     | None                  | NA      | 0            | Failed umbilical cannulation                                            |
| 17 | B382     | M   | 4                       | 2.40                     | 26.2            | High          | Yes                     | Birth asphyxia, G6PD  | 43.0    | 3            | Intensive LED PT reduced TSB while awaiting ET                          |
| 18 | B575     | M   | 11                      | 3.50                     | 25.7            | Medium        | No                      | G6PD                  | 35.0    | 0            | Failed umbilical cannulation                                            |
| 19 | B399     | M   | 4                       | 3.20                     | 25.6            | Medium        | Yes                     | G6PD                  | 32.0    | 2            | Fresh whole blood not available                                         |

AAP: American Academy of Pediatrics; BIND-M: Modified Bilirubin-Induced Neurologic Dysfunction; ET: exchange transfusion; F: Female; M: Male; TSB: Total serum bilirubin; PCV: Packed cell volume; NA: Not available; PT: phototherapy
