# Supplementary material
Source: PubMed Central journal article supplement (PMC6166872)
Supplement: NIHMS1503764-supplement-Supp1.pdf [file NIHMS1503764-supplement-Supp1.pdf]

| Clinical sign                                                                                                                                                                                                                   | Score | Severity |
|---------------------------------------------------------------------------------------------------------------------------------------------------------------------------------------------------------------------------------|-------|----------|
| <b>Mental status</b>                                                                                                                                                                                                            |       |          |
| <input type="checkbox"/> Normal                                                                                                                                                                                                 | 0     | None     |
| <input type="checkbox"/> Sleepy but arousable<br><input type="checkbox"/> Decreased feeding                                                                                                                                     | 1     | Mild     |
| <input type="checkbox"/> Lethargy<br><input type="checkbox"/> Poor suck and/or<br><input type="checkbox"/> Irritable/jittery with short-term strong suck                                                                        | 2     | Moderate |
| <input type="checkbox"/> Semi-coma<br><input type="checkbox"/> Apnea<br><input type="checkbox"/> Seizures<br><input type="checkbox"/> Coma                                                                                      | 3     | Severe   |
| <b>Muscle tone</b>                                                                                                                                                                                                              |       |          |
| <input type="checkbox"/> Normal                                                                                                                                                                                                 | 0     | None     |
| <input type="checkbox"/> Persistent mild hypotonia                                                                                                                                                                              | 1     | Mild     |
| <input type="checkbox"/> Moderate hypotonia<br><input type="checkbox"/> Moderate hypertonia<br><input type="checkbox"/> Increasing arching of neck and trunk on stimulation without spasms of arms and legs and without trismus | 2     | Moderate |
| <input type="checkbox"/> Persistent retrocolis<br><input type="checkbox"/> Opisthotonus<br><input type="checkbox"/> Crossing or scissoring of arms or legs but without spasms of arms and legs and without trismus              | 3     | Severe   |
| <b>Cry pattern</b>                                                                                                                                                                                                              |       |          |
| <input type="checkbox"/> Normal                                                                                                                                                                                                 | 0     | None     |
| <input type="checkbox"/> High pitched                                                                                                                                                                                           | 1     | Mild     |
| <input type="checkbox"/> Shrill                                                                                                                                                                                                 | 2     | Moderate |
| <input type="checkbox"/> Inconsolable crying or<br><input type="checkbox"/> Cry weak or absent in child with previous history of high pitched or shrill cry                                                                     | 3     | Severe   |
| <b>Oculomotor or eye movements</b>                                                                                                                                                                                              |       |          |
| <input type="checkbox"/> Normal                                                                                                                                                                                                 | 0     | None     |
| <input type="checkbox"/> Blank stare/Scared or Anxious appearance                                                                                                                                                               | 1     | Mild     |
| <input type="checkbox"/> Nystagmus                                                                                                                                                                                              | 2     | Moderate |
| <input type="checkbox"/> Disconjugate eye movements<br><input type="checkbox"/> Roving eyes/Aimless eye movements<br><input type="checkbox"/> Sun-setting/Paralysis of upward gaze                                              | 3     | Severe   |
| <b>Total Score</b>                                                                                                                                                                                                              |       |          |
| Scores of 1-2 are indicative of mild acute bilirubin encephalopathy (ABE); Scores 3-6 are indicative of moderate/intermediate ABE; Scores 7-12 are indicative of severe/advanced ABE                                            |       |          |

**Supplementary Figure S1.** Modified BIND (BIND-M) form for evaluating onset, severity and duration of acute bilirubin encephalopathy in clinically jaundiced infants - [Adapted from reference 13]
